# Supplementary material
Source: PubMed Central journal article supplement (PMC9539928)
Supplement: CBIC-23-0-s001.pdf [file CBIC-23-0-s001.pdf]

# ChemBioChem

Supporting Information

## **First Fluorescent Acetylspermidine Deacetylation Assay for HDAC10 Identifies Selective Inhibitors with Cellular Target Engagement\*\***

Daniel Herp, Johannes Ridinger, Dina Robaa, Stephen A. Shinsky, Karin Schmidtkunz, Talha Z. Yesiloglu, Theresa Bayer, Raphael R. Steimbach, Corey J. Herbst-Gervasoni, Annika Merz, Christophe Romier, Peter Sehr, Nikolas Gunkel, Aubry K. Miller, David W. Christianson, Ina Oehme, Wolfgang Sippl, and Manfred Jung\*

## Figures

|                                                 | <u>Page</u>  |
|-------------------------------------------------|--------------|
| <b>Substrate conversion by HPLC</b>             | <b>SI2</b>   |
| <b>Linearity of fluorescence signal</b>         | <b>SI3</b>   |
| <b>IC<sub>50</sub> curves</b>                   | <b>SI4-5</b> |
| <b>Molecular docking</b>                        | <b>SI6-7</b> |
| <b>Cellular histone and tubulin acetylation</b> | <b>SI8</b>   |

| <u>Tables</u>                   | <u>Page</u>   |
|---------------------------------|---------------|
| <b>Assay validation</b>         | <b>SI9-10</b> |
| <b>Enzymatic activities</b>     | <b>SI10</b>   |
| <b>X-ray structure analysis</b> | <b>SI11</b>   |

## Substrate conversion by HPLC

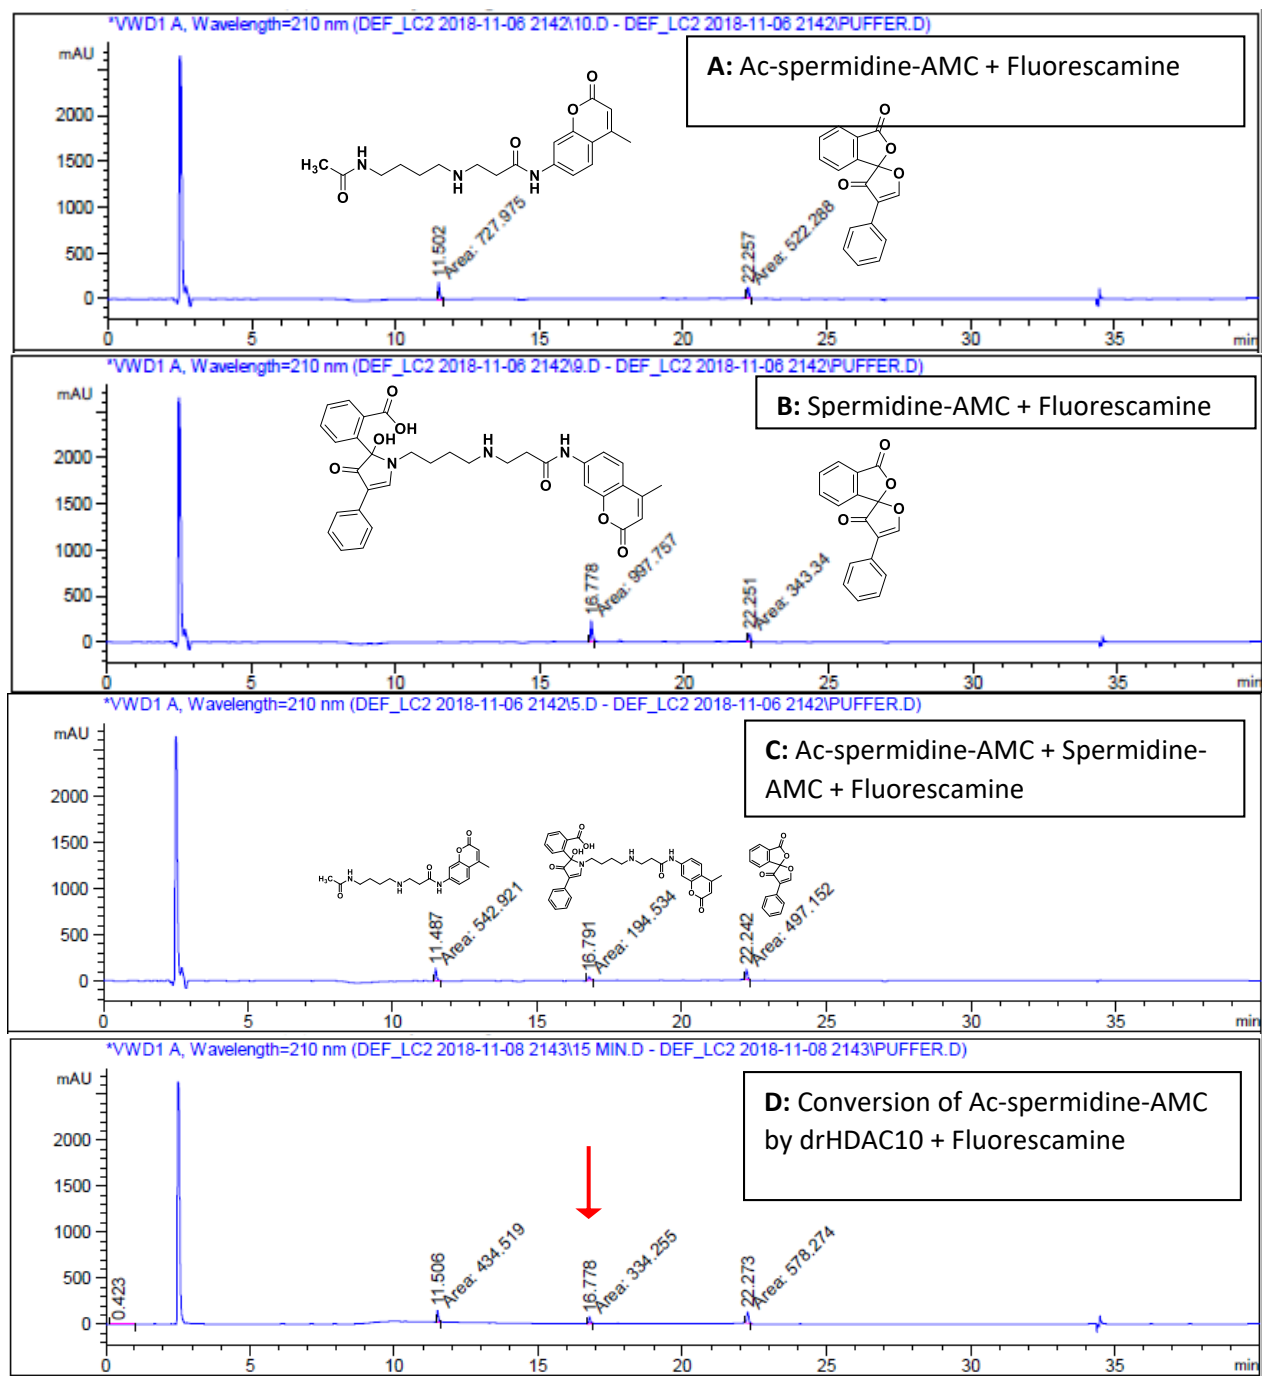

**Figure S1.** HPLC chromatograms showing substrate conversion. Panels **A-C**: standard solutions, panel **D**: enzymatic conversion: a new peak corresponding to the fluorescamine derivative of the product is occurring around 16.8 min (red arrow) similar to the mixture of substrate and product (**C**). Compare lane **A** as starting point and lane **B** for derivatized product only.

## Linearity of fluorescence signal

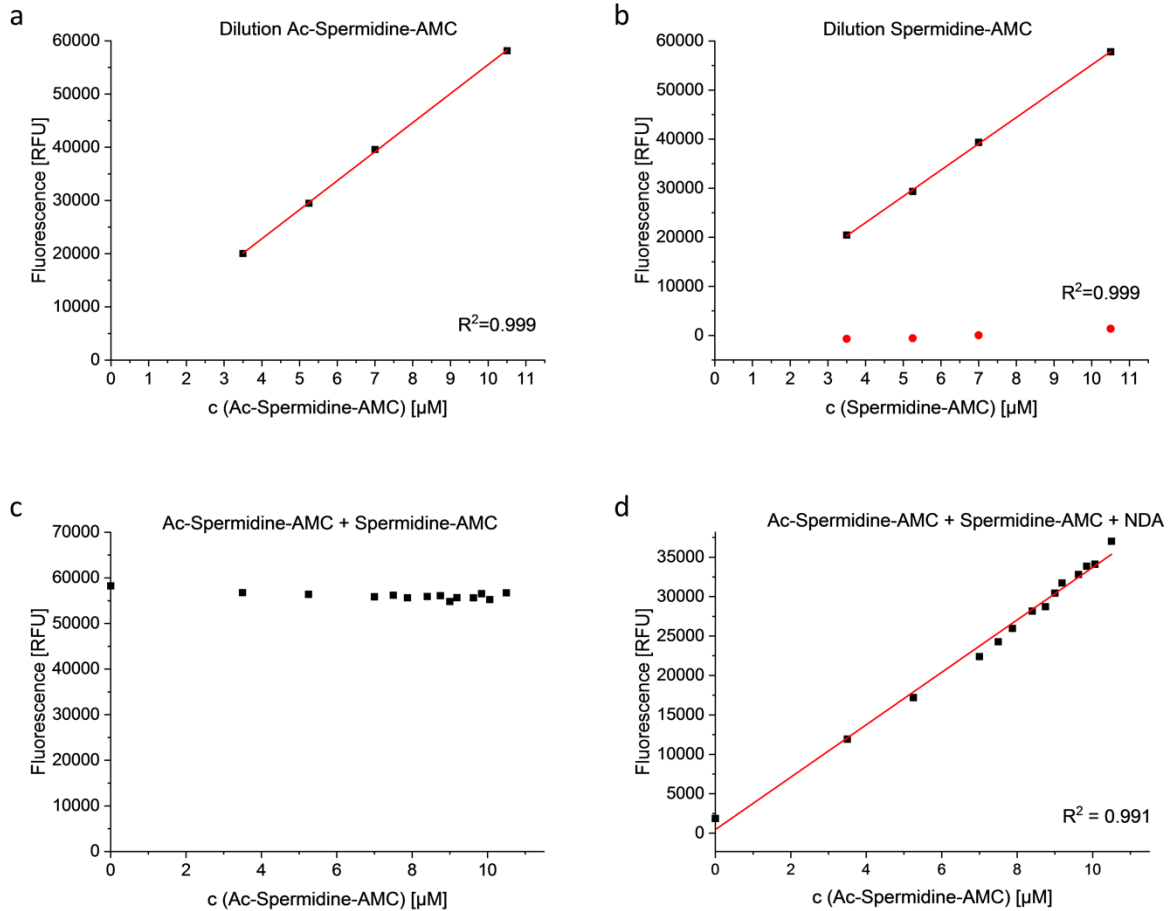

**Figure S2:** Linearity of fluorescence signal of Ac-spermidine-AMC and Spermidine-AMC. a) Intensities for a dilution of Ac-spermidine-AMC [10.5 μM, 7.0 μM, 5.25 μM, 3.5 μM]; b) Intensities for a dilution of Spermidine-AMC [10.5 μM, 7.0 μM, 5.25 μM, 3.5 μM], black squares before adding stop solution containing NDA, red dots after stop solution and quenching; c) complementation of AC-Spermidine-AMC with Spermidine-AMC to the same total amount of AMC-derivatives results in a stable signal; d) Simulation of enzymatic conversion by quenching of the fluorescence signal of Spermidine-AMC by adding NDA dilution to the complemented mixture of substrate and deacetylated product.

# IC<sub>50</sub> curves

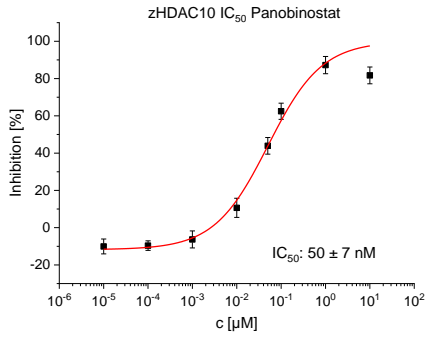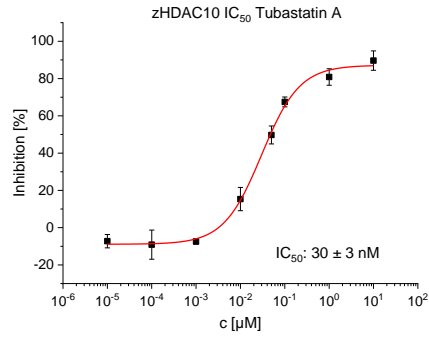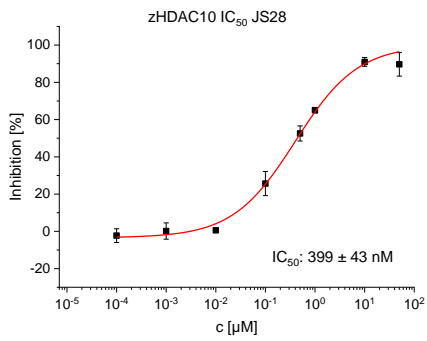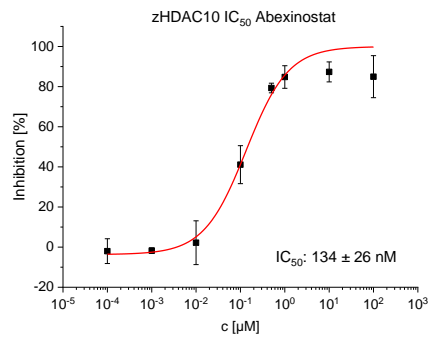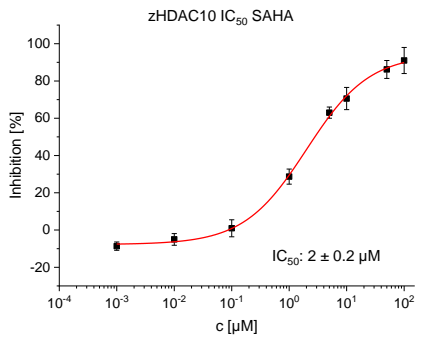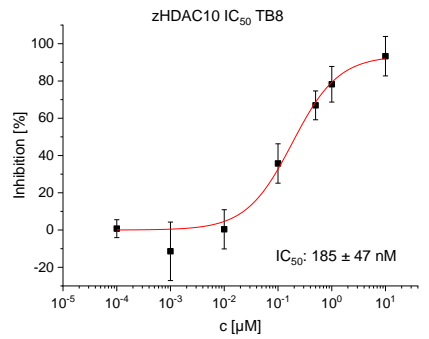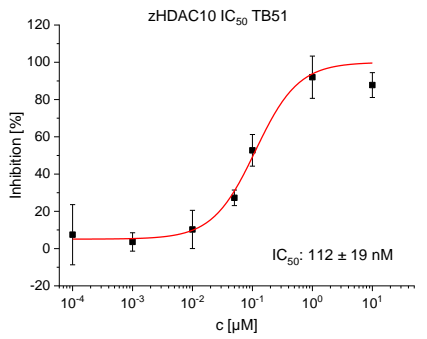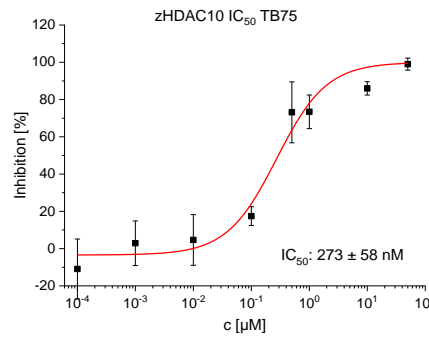

**Figure S3.** IC<sub>50</sub> curves for drHDAC10 of different HDAC inhibitors; one experiment performed in quadruplicate, error bars represent standard deviation of the mean, error of IC<sub>50</sub> value is shown as SEM of the non-linear regression.

## Molecular docking

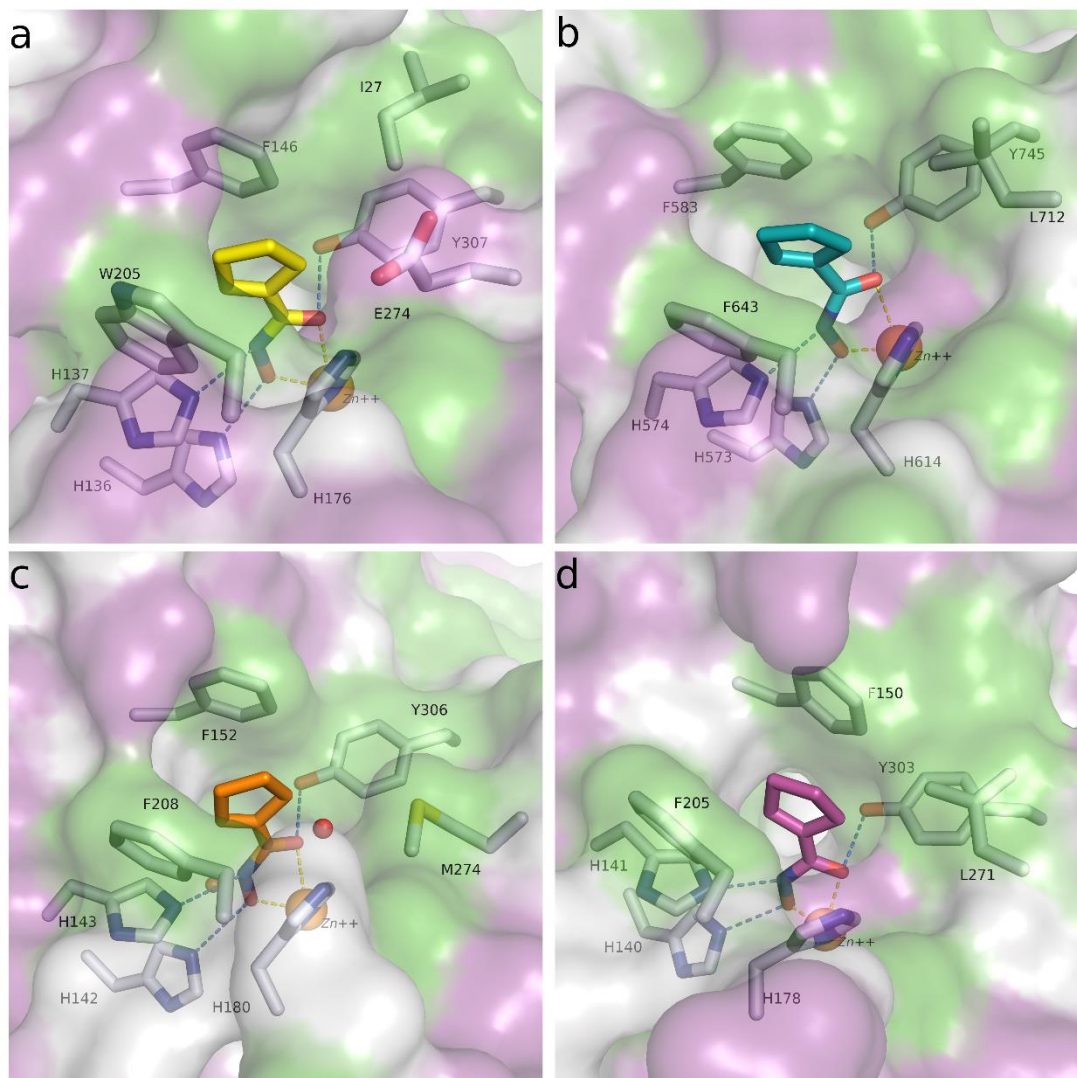

**Figure S4.** a) Predicted binding mode of **BRD9757** (yellow sticks) in drHDAC10 (PDB ID 6UHU), b) X-ray structure (PDB ID 6CSS) of drHDAC6 in complex with **BRD9757** (teal sticks), c) Predicted binding mode of **BRD9757** (orange sticks) in HDAC8 (PDB ID 2V5X), d) Predicted binding mode of **BRD9757** (magenta sticks) in HDAC1 (PDB ID 5ICN). The surface of the proteins is colored according to lipophilicity; green for hydrophobic and magenta for hydrophilic. Side chains of binding site residues are shown as white sticks and the catalytic zinc ion as orange spheres. Hydrogen bonds and salt bridge interactions are depicted as blue-dashed lines and coordination of the zinc ion by the ligand as yellow-dashed lines.

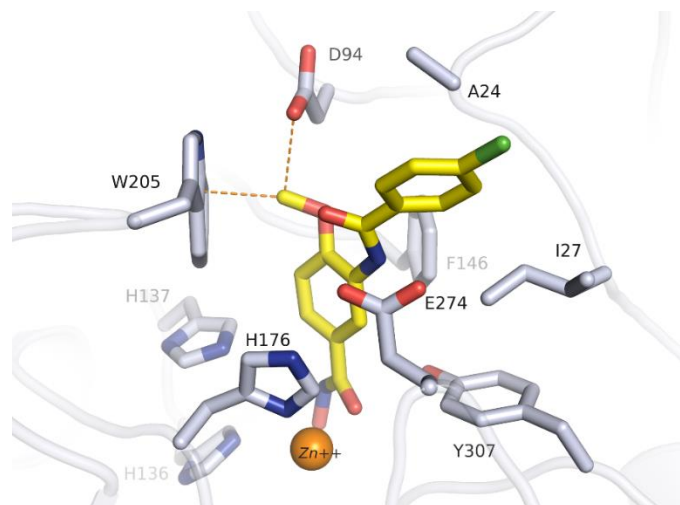

**Figure S5.** The obtained docking pose of the *m*-substituted benzhydroxamate TH68 (**38b**) shows clashes with residues in the binding site of drHDAC10 (PDB ID 6UHU).

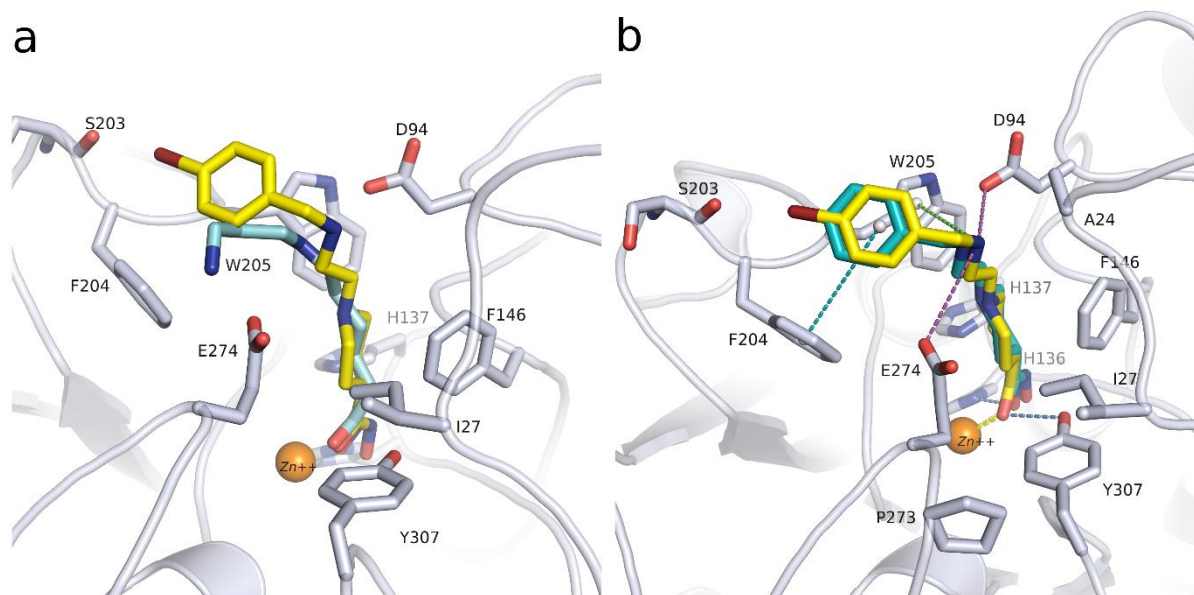

**Figure S6.** a) Predicted binding mode of **48b** (yellow sticks) in drHDAC10 (PDB ID 6UHU) overlapped with the experimentally determined binding mode of N<sup>8</sup>-acetylspermidine analogue inhibitor (cyan sticks) taken from the respective crystal structure (PDB ID 6UHV), b) predicted binding mode of **48b** (yellow sticks) and **48a** (cyan sticks) in drHDAC10 (PDB ID 6UHU). Binding site residues are shown as white sticks and the catalytic zinc ion as orange spheres. Hydrogen bonds interactions are depicted as blue-dashed lines, salt bridge interactions as magenta-dashed lines, cation- $\pi$  interactions as teal-dashed lines, and coordination of the zinc ion by the ligand as yellow-dashed lines.



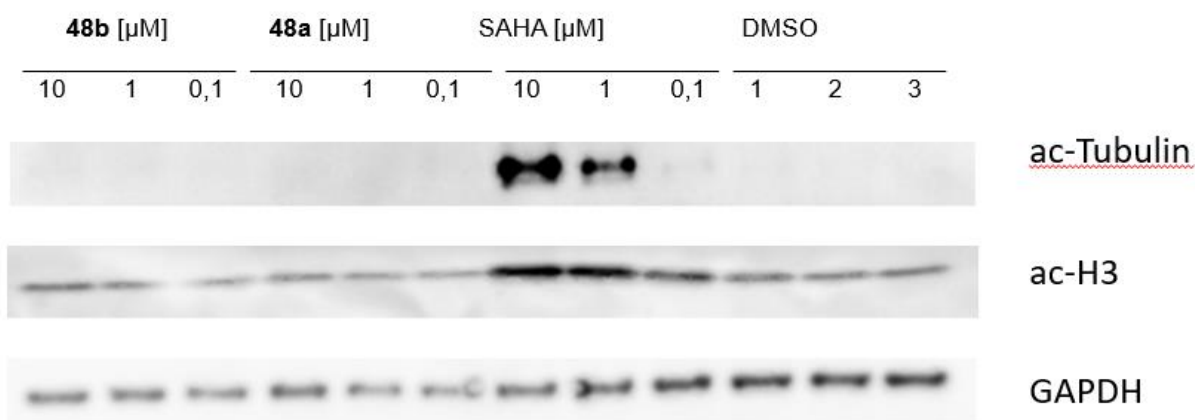

**Figure S7.** Acetylation level of HDAC substrate proteins as measured by Western blotting in HL60 cells. Ac-Tubulin is the prototypical HDAC6 substrate, ac-H3 the class I (HDAC1) substrate. Selective inhibitors **48a-b** do not result in hyperacetylation whereas positive control SAHA (vorinostat, **6**) results in robust hyperacetylation of both substrates.

**Table S1: Dilution ratios for HPLC calibration curve**

| Spermidine-AMC      | Ac-spermidine-AMC    | Fluorescamine    |
|---------------------|----------------------|------------------|
| 0 [μM] / 0 μl       | 100 [μM] / 50 μl     | 300 [μM] / 50 μl |
| 5 [μM] / 2.5 μl     | 95 [μM] / 47.5 μl    | 300 [μM] / 50 μl |
| 10 [μM] / 5 μl      | 90 [μM] / 45 μl      | 300 [μM] / 50 μl |
| 12.5 [μM] / 6.25 μl | 87.5 [μM] / 43.75 μl | 300 [μM] / 50 μl |
| 20 [μM] / 10 μl     | 80 [μM] / 40 μl      | 300 [μM] / 50 μl |
| 25 [μM] / 12.5 μl   | 75 [μM] / 37.5 μl    | 300 [μM] / 50 μl |
| 50 [μM] / 25 μl     | 50 [μM] / 25 μl      | 300 [μM] / 50 μl |
| 75 [μM] / 37.5 μl   | 25 [μM] / 12.5 μl    | 300 [μM] / 50 μl |
| 100 [μM] / 50 μl    | 0 [μM] / 0 μl        | 300 [μM] / 50 μl |

**Table S2: Dilution ratios for determination of linearity**

| Ac-spermidine-AMC [μM] | Spermidine-AMC [μM] | Fluorescence [RFU] |
|------------------------|---------------------|--------------------|
| 0                      | 10.5                | 186.,25            |
| 3.5                    | 7                   | 11923.25           |
| 5.25                   | 5.25                | 17197.25           |
| 7                      | 3.5                 | 22397.75           |
| 7.5                    | 3                   | 24276              |
| 7.875                  | 2.625               | 25970.75           |
| 8.4                    | 2.1                 | 28166              |
| 8.75                   | 1.75                | 28723              |
| 9                      | 1.5                 | 30456.75           |
| 9.1875                 | 1.3125              | 31729.75           |
| 9.625                  | 0.875               | 32802.75           |
| 9.84375                | 0.65625             | 33851.75           |
| 10.0625                | 0.4375              | 34106.5            |
| 10.5                   | 0                   | 37021.75           |

**Table S3. Data for determination of Z'-factor of three experiments on three different days**

|                          | Day 1            |                  | Day 2            |                  | Day 3            |                  |
|--------------------------|------------------|------------------|------------------|------------------|------------------|------------------|
|                          | Positive control | Negative control | Positive control | Negative control | Positive control | Negative control |
| Mean (RFU)               | 38225            | 51427            | 33509            | 45089            | 37410            | 48455            |
| Standard deviation (RFU) | 1074             | 920              | 849              | 981              | 967              | 874              |
| Z'-factor                | 0.55             |                  | 0.53             |                  | 0.50             |                  |

**Table S4. Activity of the different HDAC isotypes on the pan-deacetylase substrate ZMTFAL**

| Enzyme [ $\mu$ L/well] | Conversion of ZMTFAL [%] |        |        |          |
|------------------------|--------------------------|--------|--------|----------|
|                        | hHDAC1                   | hHDAC6 | hHDAC8 | drHDAC10 |
| 1                      | 15.9                     | 3.3    | -      | 88.5     |
| 0.5                    | 3.1                      | 1.9    | -      | 65.1     |
| 0.1                    | 0.0                      | 0.4    | 100    | 13.4     |
| 0.01                   | 0.0                      | 0.0    | 38.7   | 0.3      |
| 0.005                  | -                        | -      | 15.0   | -        |
| 0.001                  | -                        | -      | 3.1    | -        |

**Table S5. Conversion of the HDAC10 substrate by the different enzymes. Enzyme amounts normalized to equi-effective deacetylation of pan-substrate according to Table S4.**

| Subtype  | Enzyme [ $\mu$ L/well] | Conversion of Ac-spermidine-AMC [%] |
|----------|------------------------|-------------------------------------|
| hHDAC1   | 1                      | 3.5                                 |
| hHDAC6   | 1                      | 5.8                                 |
| hHDAC8   | 0.005                  | 3.7                                 |
| drHDAC10 | 0.1                    | 93.3                                |

**Table S6. X-ray Crystallographic Data Collection and Refinement Statistics<sup>a</sup>**

| HDAC10 Complex                                       | HDAC10-DH79                |
|------------------------------------------------------|----------------------------|
| <b>Space group</b>                                   | <i>P</i> 3 <sub>1</sub> 21 |
| <b>a,b,c (Å)</b>                                     | 80.9, 80.9, 247.5          |
| <b>α, β, γ (°)</b>                                   | 90, 90, 120                |
| <b>R<sub>merge</sub><sup>b</sup></b>                 | 0.139 (1.291)              |
| <b>R<sub>pim</sub><sup>c</sup></b>                   | 0.056 (0.506)              |
| <b>CC<sub>1/2</sub><sup>d</sup></b>                  | 0.994 (0.664)              |
| <b>Redundancy</b>                                    | 7.0 (7.3)                  |
| <b>Completeness (%)</b>                              | 99.8 (99.9)                |
| <b>I/σ</b>                                           | 8.6 (2.0)                  |
| Refinement                                           |                            |
| <b>Resolution (Å)</b>                                | 53.38–2.18<br>(2.26–2.18)  |
| <b>No. reflections</b>                               | 49895 (4923)               |
| <b>R<sub>work</sub>/R<sub>free</sub><sup>e</sup></b> | 0.180/0.210 (0.253/0.288)  |
| Number of Atoms <sup>f</sup>                         |                            |
| <b>Protein</b>                                       | 4863                       |
| <b>Ligand</b>                                        | 51                         |
| <b>Solvent</b>                                       | 264                        |
| Average B factor (Å <sup>2</sup> )                   |                            |
| <b>Protein</b>                                       | 43                         |
| <b>Ligand</b>                                        | 46                         |
| <b>Solvent</b>                                       | 44                         |
| Root-Mean-Square Deviation                           |                            |
| <b>Bond lengths (Å)</b>                              | 0.007                      |
| <b>Bond angles (°)</b>                               | 0.9                        |
| Ramachandran Plot (%) <sup>g</sup>                   |                            |
| <b>Favored</b>                                       | 96.23                      |
| <b>Allowed</b>                                       | 3.46                       |
| <b>Outliers</b>                                      | 0.31                       |
| <b>PDB Entry</b>                                     | 7U59                       |

<sup>a</sup>Values in parentheses refer to the highest-resolution shell of data.

<sup>b</sup> $R_{\text{merge}} = \frac{\sum_h \sum_i |I_{i,h} - \langle I \rangle_h|}{\sum_h \sum_i I_{i,h}}$ , where  $\langle I \rangle_h$  is the average intensity calculated for reflection  $h$  from  $i$  replicate measurements.

<sup>c</sup> $R_{\text{p.i.m.}} = \frac{(\sum_h (1/(N-1))^{1/2} \sum_i |I_{i,h} - \langle I \rangle_h|)}{\sum_h \sum_i I_{i,h}}$ , where  $N$  is the number of reflections and  $\langle I \rangle_h$  is the average intensity calculated for reflection  $h$  from replicate measurements.

<sup>d</sup>Pearson correlation coefficient between random half-datasets.

<sup>e</sup> $R_{\text{work}} = \frac{\sum ||F_o| - |F_c||}{\sum |F_o|}$  for reflections contained in the working set.  $|F_o|$  and  $|F_c|$  are the observed and calculated structure factor amplitudes, respectively.  $R_{\text{free}}$  is calculated using the same expression for reflections contained in the test set held aside during refinement.

<sup>f</sup>Per asymmetric unit. <sup>g</sup>Calculated with MolProbity.
